# Supplementary material
Source: PubMed Central journal article supplement (PMC8595704)
Supplement: NIHMS1743587-supplement-2.pdf [file NIHMS1743587-supplement-2.pdf]

## **Supplemental Information**

### **Ultrasmall episymbiotic *Saccharibacteria* suppresses gingival inflammation and bone loss through host bacterial modulation**

Otari Chipashvili, Daniel R. Utter, Joseph K. Bedree, Yansong Ma, Fabian Schulte, Gabrielle Mascarin, Yasmin Alayyoubi, Deepak Chouhan, Markus Hardt, Felicitas Bidlack, Hatice Hasturk, Xuesong He, Jeffrey S. McLean, Batbileg Bor

Figure S1. Related to Figure 1.

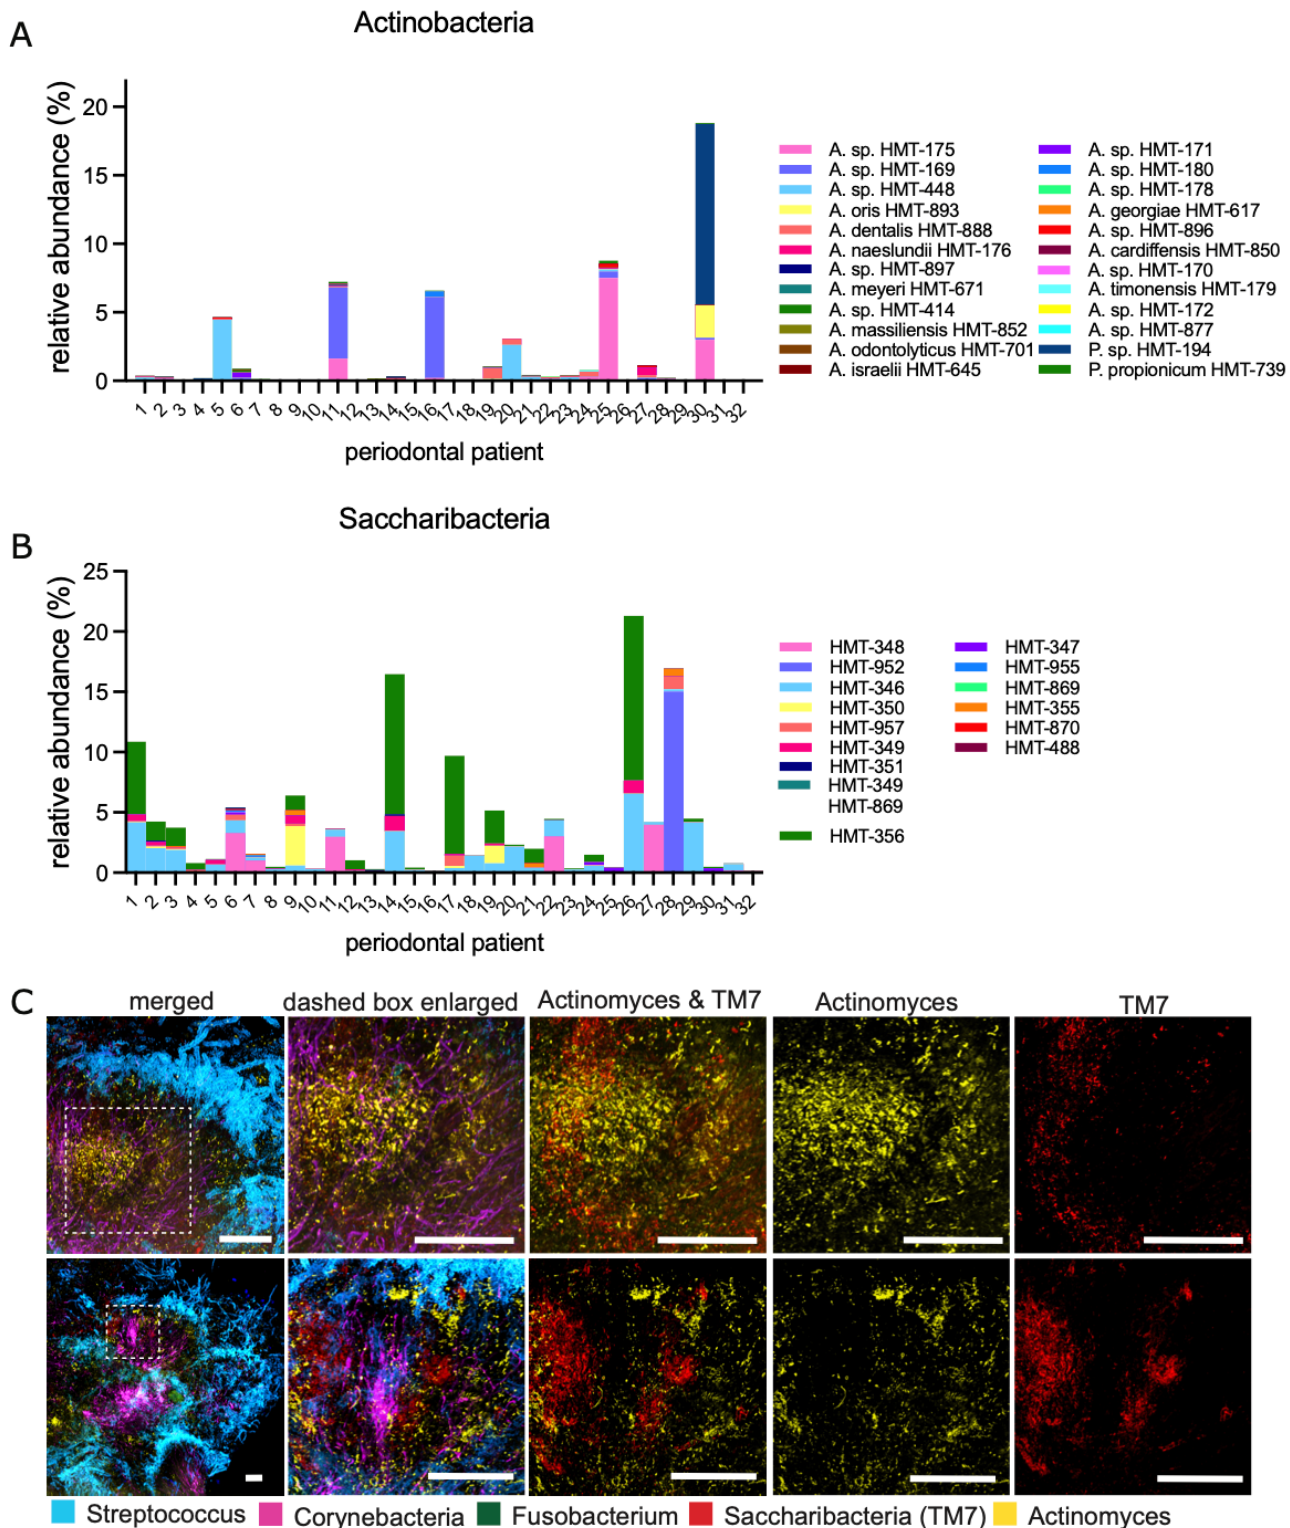

**Figure S1. TM7 bacteria in periodontal plaque. Related to Figure 1.** (A) Actinobacteria and (B) TM7 bacteria 16S rRNA profiling for individual samples for 32 patient cohort. Some samples contained TM7 bacteria up to 60% of the total relative abundance. (C) Additional FISH-Spectral imaging sample images of periodontal plaque from separate patients. Six bacteria were stained with genus-specific probes. All scale bars are 30  $\mu$ m.

Figure S2. Related to Figure 2.

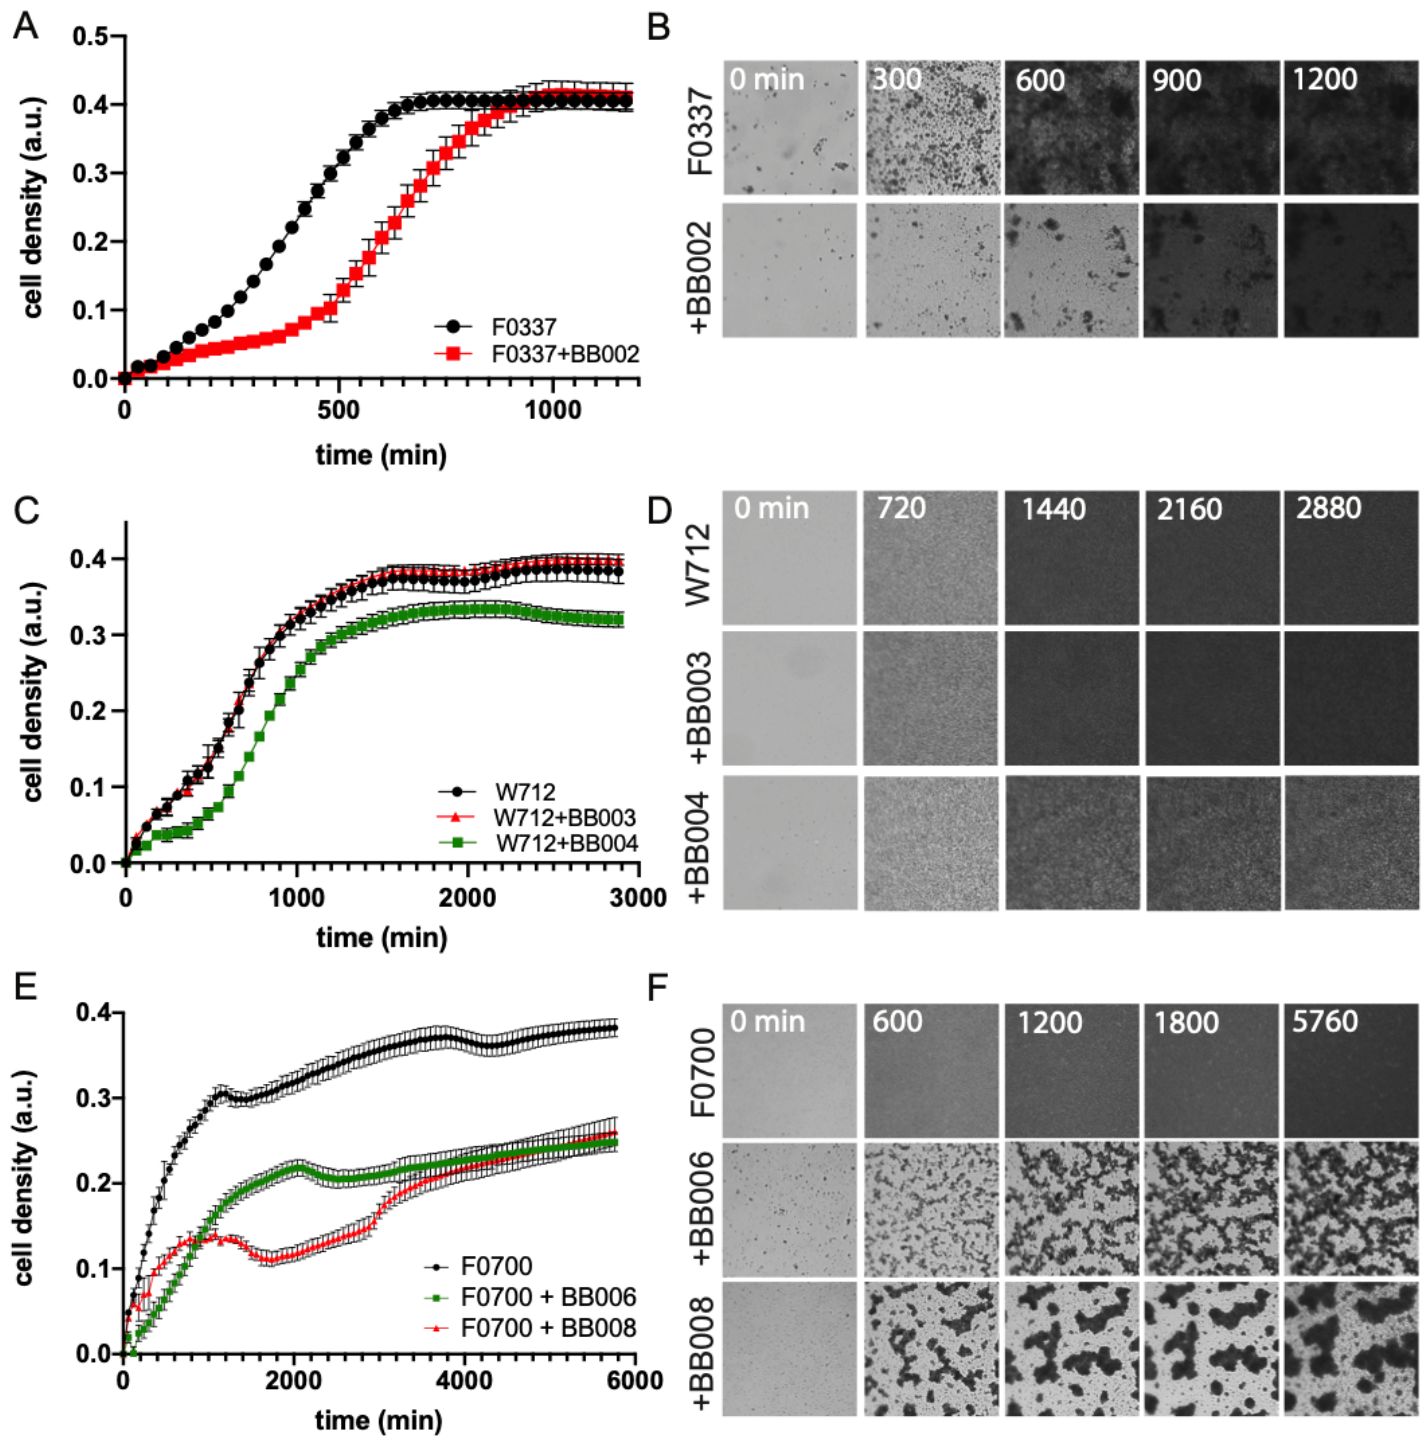

**Figure S2. Growth curve of TM7 and their host bacteria. Related to Figure 2.** (A, C, E) Cell density measurement (arbitrary unit, a.u.) was graphed across time (minutes) in each mono (black) or cocultures (green or red) using OcelloScope (see STAR methods). (B, D, F) Individual representative images of a particular culture at indicated times are shown, which correlates with the graphs in A, C, and E.

**Figure S3. Related to Figure 3.**

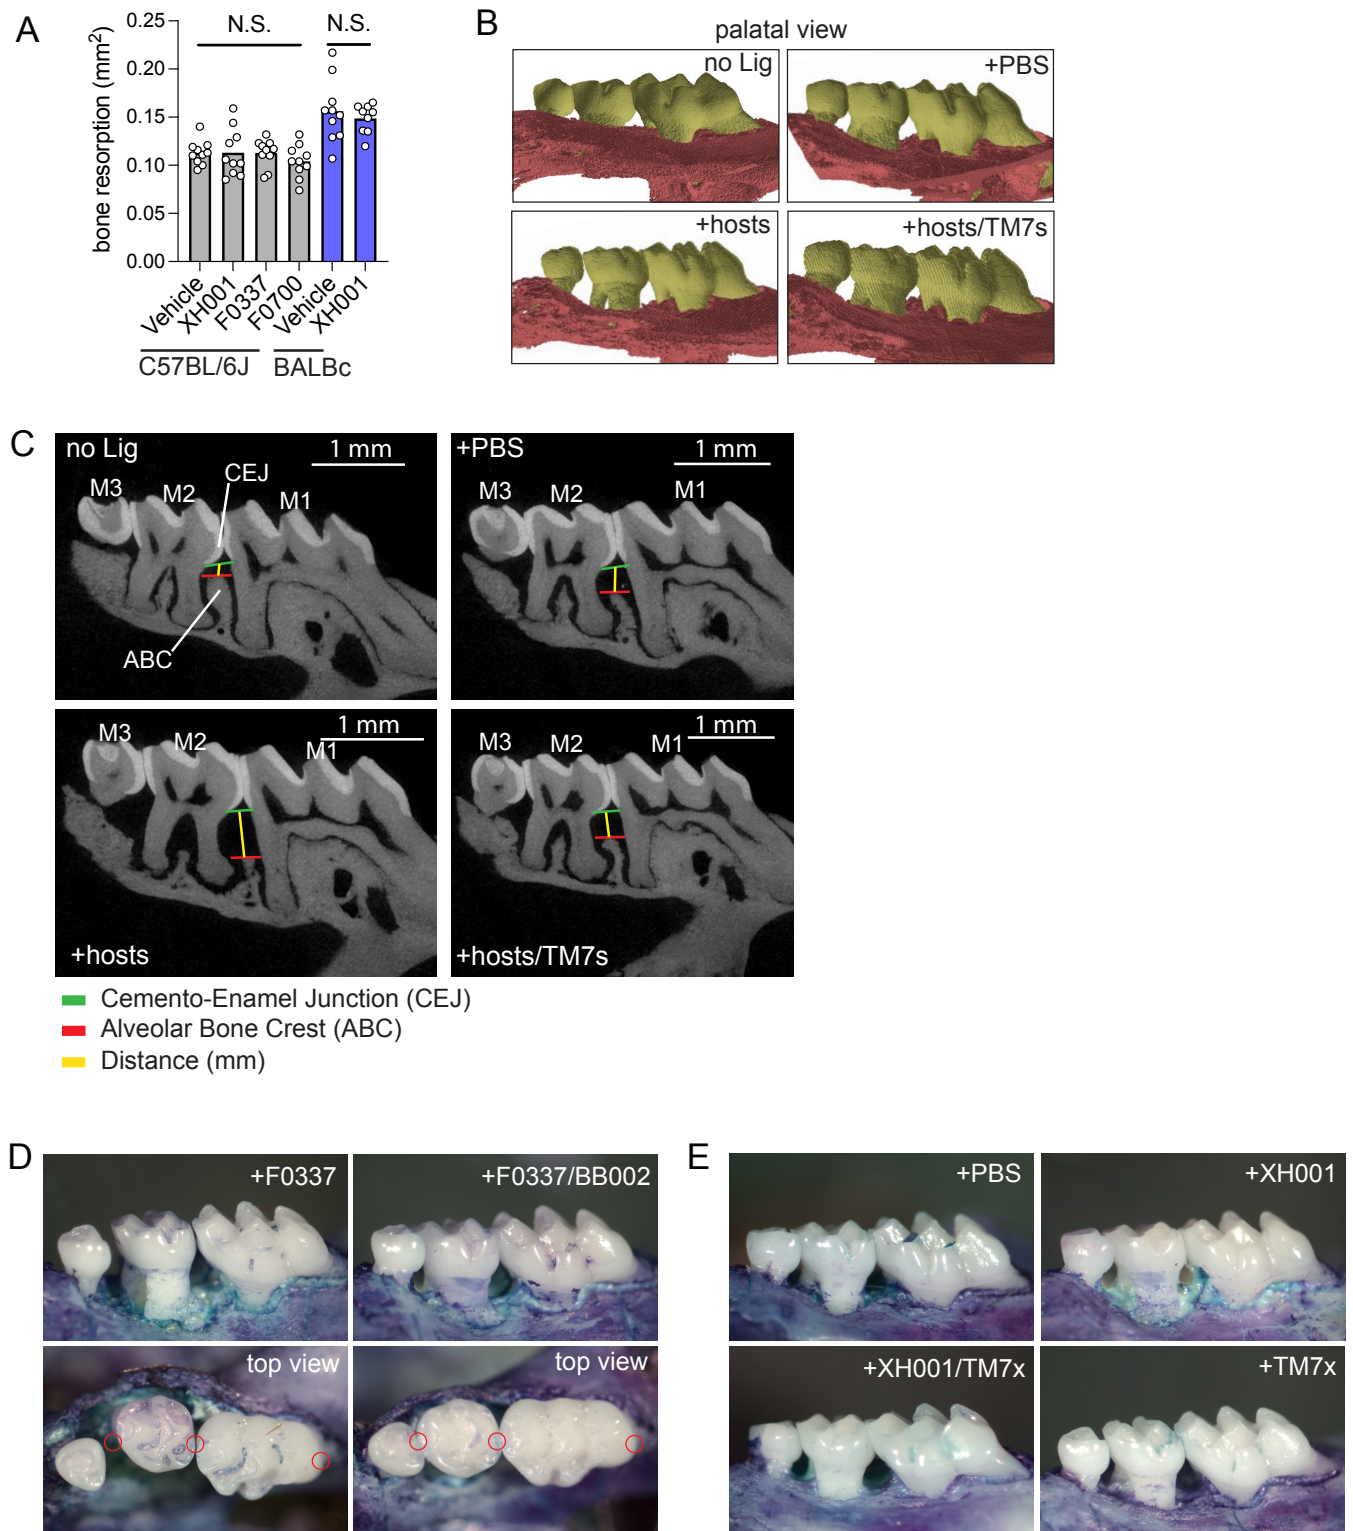

**Figure S3. Ligature-induced periodontitis model. Related to Figure 3.** (A) Quantification of bone resorption in the oral infection model after antibiotic treatment and repeated inoculation by indicated bacteria. Results are shown as mean (bar)  $\pm$  SD. Each dot indicates an individual ligature (n = 6-10). N.S., not significant by Mann-Whitney U test. (B) 3D images of maxillae taken with a microCT scanner to show the differences in bone resorption in the periodontitis ligature model from the palatal view. The buccal view is shown in Figure 3A. (C)

The distance between the cemento-enamel junction (CEJ) and the alveolar bone crest (ABC) was measured between groups using microCT image section. Molars 1-3 are shown as M1-M3. (D) Representative images of the bone loss observed in F0337 host alone and F0337 with BB002 from Figure 3E. Top row is plane of view from the buccal side while bottom row is view from top of the molars. Red circles indicate disruption of teeth alignment. (E) Representative buccal view of maxillary molars of PBS, XH001, TM7x/XH001 and TM7x groups that is quantified in Figure 3E.

**Figure S4. Related to Figure 3.**

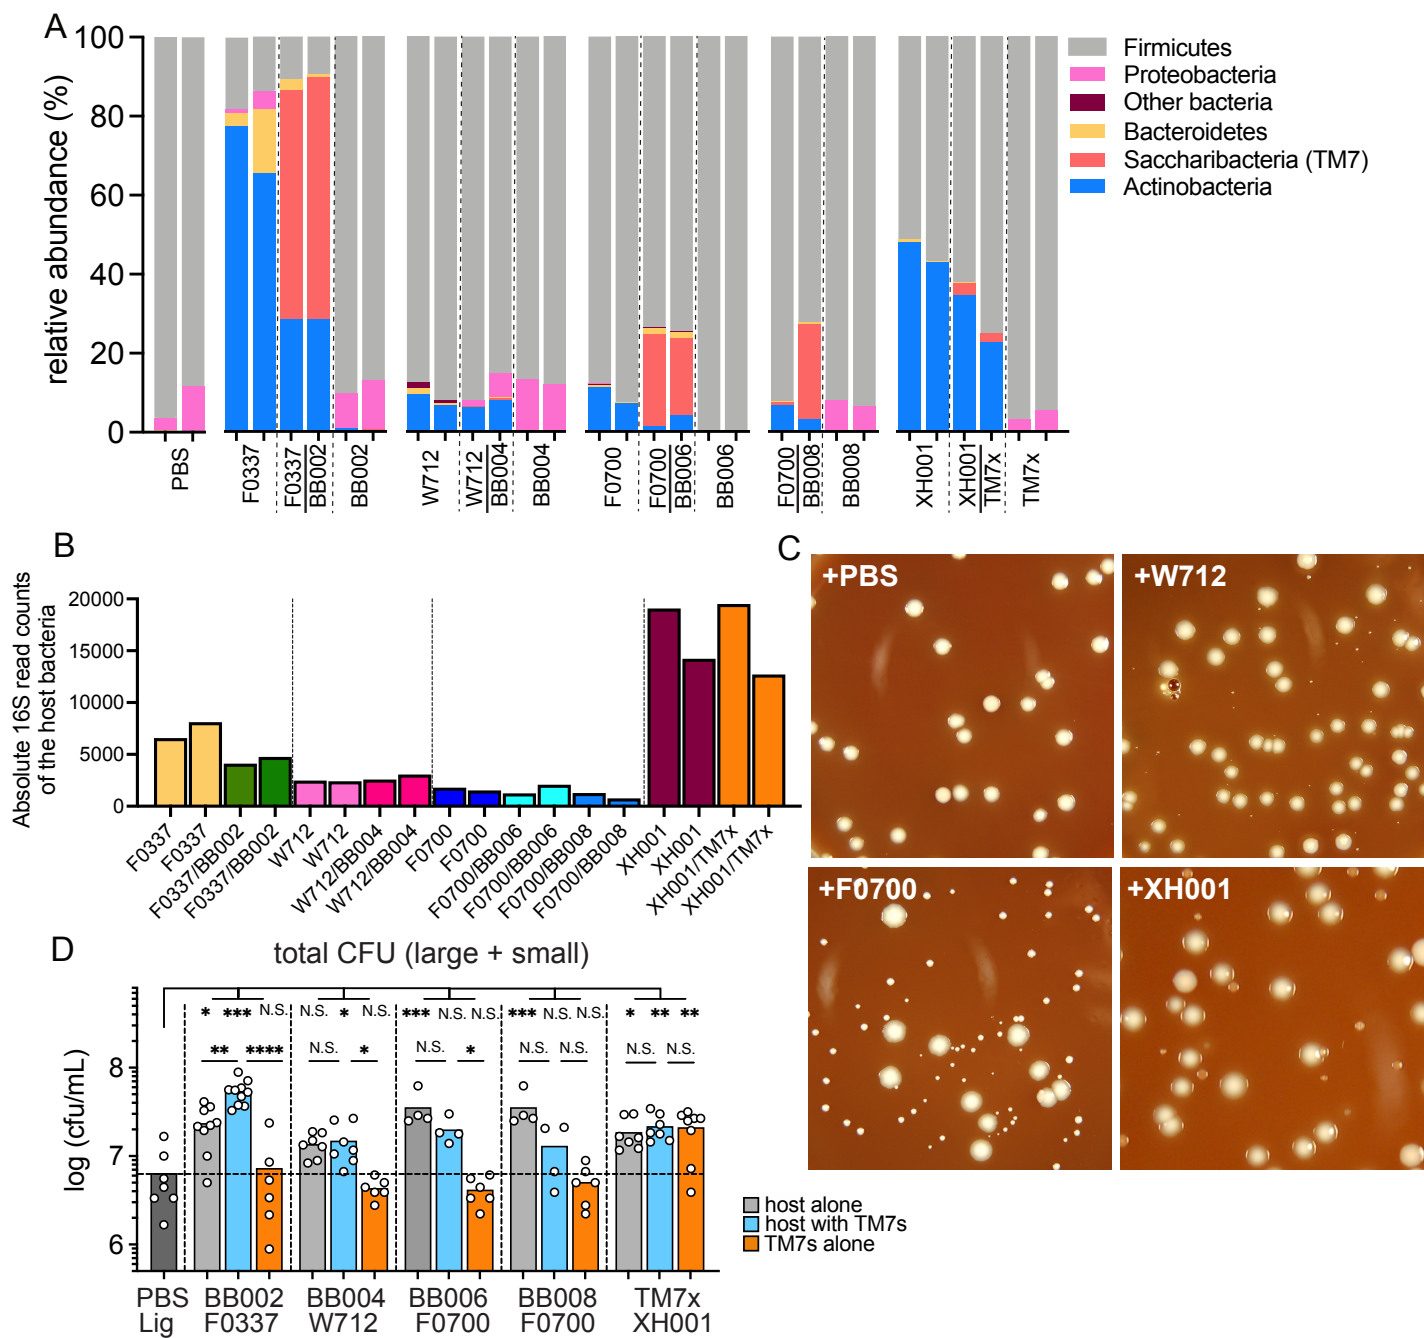

**Figure S4. Ligature microbiome and their analysis. Related to Figure 3.** (A) 16S rRNA relative abundance of ligature microbiome across different culture infections were analyzed. For each ligature microbiome group, two independent experiments were conducted and shown in the bar graph. (B) Absolute read counts of the 16S rRNA specific to TM7 or host bacteria were plotted from the sequencing study in panel A. Each matching color represent duplicate experiments from the same group. When analyzing this data, we compared only within groups and not between groups due to technical reasons (see methods). Further supporting information for this graph can be found in Table S6. (C) Representative images of the colonies that result from plating the bacteria that were obtained from the ligatures after extraction from the mouse oral cavity. In groups where host bacteria were added to the ligature, we observe slow growing “small” colonies. By PCR, small colony forming units (CFUs)

were confirmed to be host bacteria and the large CFUs were mostly native oral bacteria that dominated by *Firmicutes*. (D) Quantification of total CFUs, including small and large, that were recovered from each ligature after the experiment in Figure 3E. Results are shown as mean (bar)  $\pm$  SD. Each dot indicates an individual ligature (n = 4-10). N.S., not significant; \*p < 0.05, \*\*p < 0.01, \*\*\*p < 0.001, \*\*\*\*p < 0.0001 by one-way ANOVA followed by Bonferroni post hoc test.

**Figure S5. Related to Figure 4.**

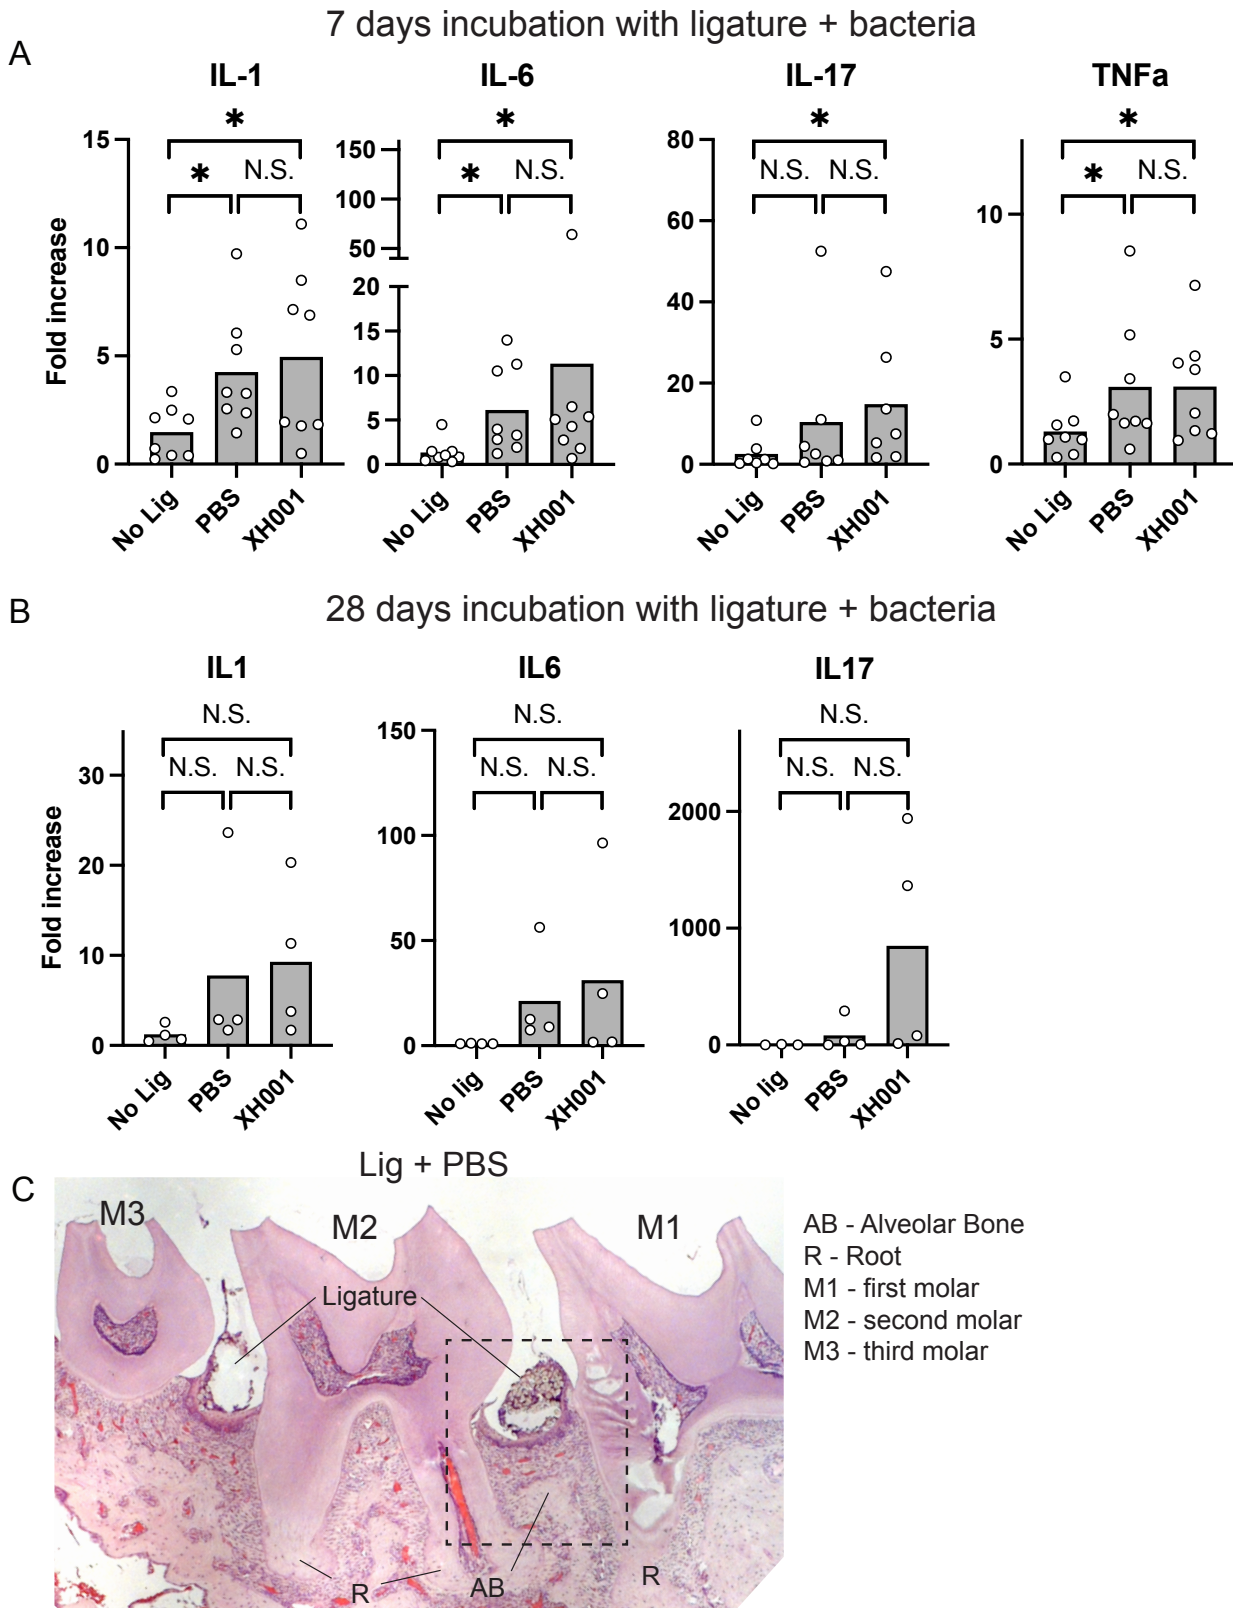

**Figure S5. Tissue cytokine and histology analysis. Related to Figure 4.** (A-B) Periodontitis was induced in C57BL6 mice by using the ligature model with indicated different groups. Ligatures were kept in the mice for 7 or 28 days and the mRNA expression of IL-1, IL-6, IL-17 and TNFα from the gingiva was extracted and quantified



by qPCR. Results are shown as mean (bar)  $\pm$  SD. Each dot indicates an adjacent tissue from individual ligature (n = 4-10). N.S., not significant; \*p < 0.05, \*\*p < 0.01, \*\*\*p < 0.001, \*\*\*\*p < 0.0001 by one-way ANOVA followed by Bonferroni post hoc test. (C) Histology tissue section that is stained with H&E showing area of analysis in Figure 4. Three molars (M1-M3) are clearly visible, and we targeted the area between M1 and M2 (dashed black box). Ligatures were kept in place during the histology section to show their location.

**Figure S6. Related to Figure 6.**

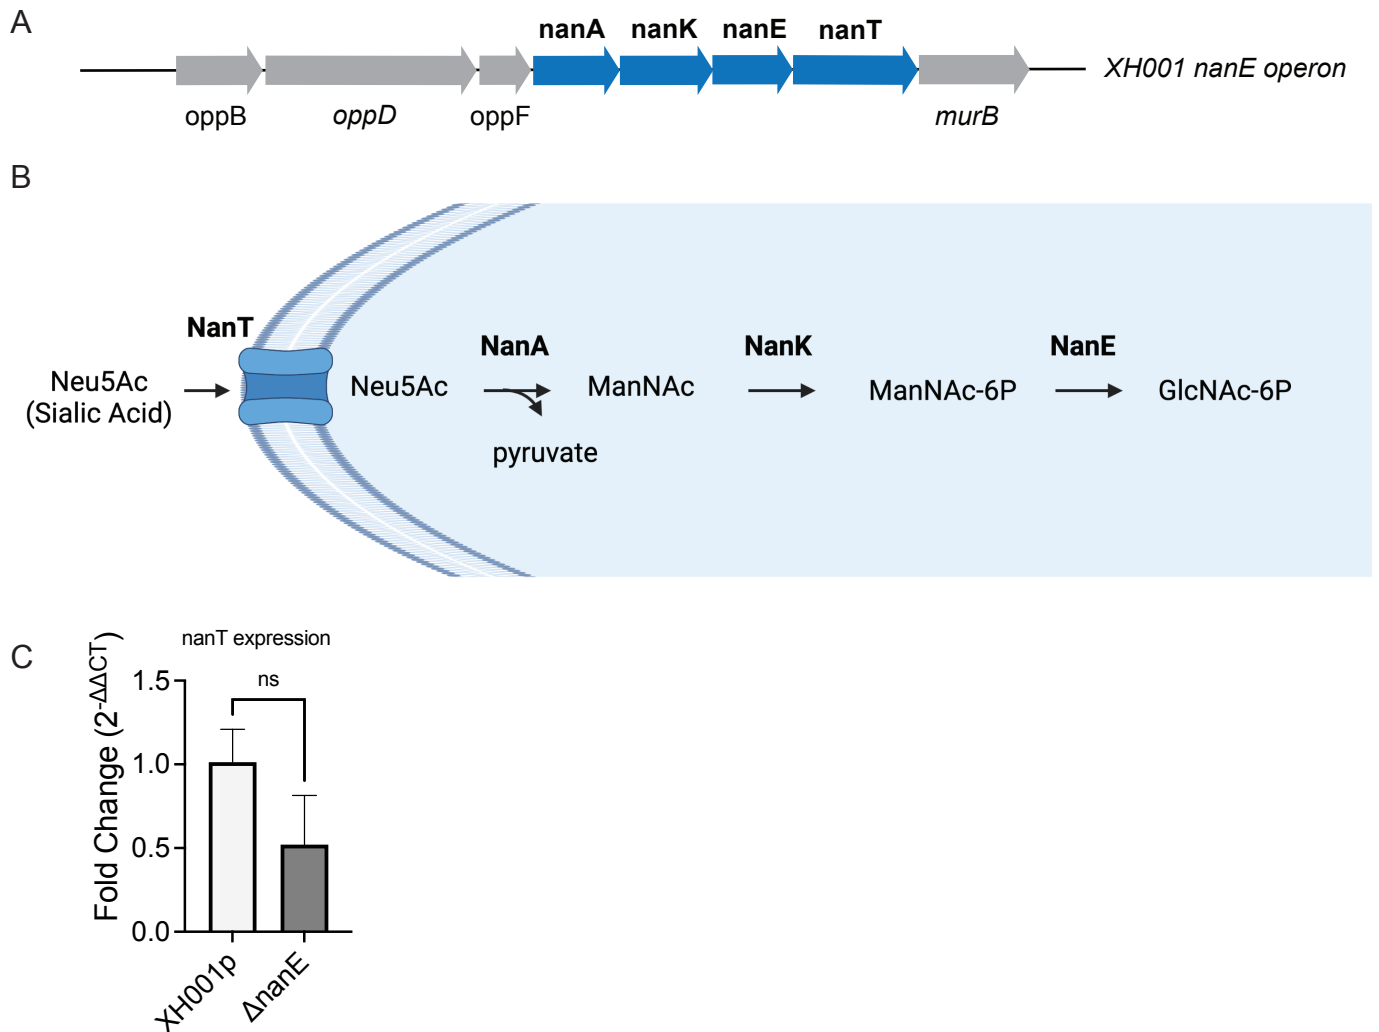

**Figure S6. *NanE* gene operon characterization. Related to Figure 6.** (A) Gene analysis of the XH001 genome revealed full set of *NanE* gene operon (*nanA*, *nanK*, *nanT*). (B) *NanE* operon is crucial for transportation and metabolisms of mammalian sialic acid, which is shown by cartoon model. (C) Quantification of *nanT* expression level in XH001p and *nanE* mutant using RT-qPCR with 16S rRNA gene as a baseline. The experiment was done with three biological replicates with standard deviation (error bar) depicting the variation. N.S., not significant with student t-test.

**Table S1. TM7 is associated with numerous inflammatory diseases. Related to Introduction.**

| Body site              | Disease type                                   | References                                                                                                                                                                                                                                 |
|------------------------|------------------------------------------------|--------------------------------------------------------------------------------------------------------------------------------------------------------------------------------------------------------------------------------------------|
| Human Oral Cavity      | gingivitis                                     | Al-Kamel et al., 2019, J Oral Micro. 1:1608141<br>Huang et al., 2011, BMC Oral Health. 11:33                                                                                                                                               |
|                        | smoking                                        | Duan et al., 2017, J Periodontol. 12:1297-1308<br>Ganesan et al., 2017, ISME J. 9:2075-2089                                                                                                                                                |
|                        | halitosis                                      | Kazor et al., 2003, J Clin Microbol. 2:558-663<br>Seerangaiyan et al., 2017, J Breath Res. 3:036010                                                                                                                                        |
|                        | leukocyte adhesion deficiency I                | Moutsopoulos et al., 2015, Plos Path. 3:e1004698                                                                                                                                                                                           |
|                        | peri-implantitis                               | Yu et al., 2019, Clin Oral Implant Res. 8:760-776                                                                                                                                                                                          |
|                        | invisalign/fixed-appliance induced alterations | Wang et al., 2019, Am J Orthod Dent Orthop. 5:633-640                                                                                                                                                                                      |
|                        | periodontitis                                  | Griffen et al., 2012, ISME J. 6:1176-1185<br>Abusleme et al., 2013, ISME J. 5:1016-1025<br>Galimanas et al., 2014, Microbiome. 2:32<br>Papapanou et al., 2020, J Periodontol. 1:S56-S67<br>Wei et al., 2019, Front Cell Infect Micro. 9:53 |
| Other Human body sites | vaginosis                                      | Fredricks et al., 2005, N Engl J Med, 18:1899-1911                                                                                                                                                                                         |
|                        | preterm birth                                  | Fettweis et al., 2019, Nat Med, 6:1012-1021                                                                                                                                                                                                |
|                        | pelvic inflammatory disease                    | Haggerty et al., 2020, Sex Transm Dis.                                                                                                                                                                                                     |
|                        | cervical cancer                                | Tango et al., 2020, Sci Rep. 16:10(1):9720                                                                                                                                                                                                 |
|                        | inflammatory bowel disease                     | Kuehbacher et al., 2008, J Med Microbiol. 57:1569-1576<br>Qi et al., 2020, Genomics.                                                                                                                                                       |
|                        | ulcerative colitis                             | Zakerska-Banaszak et al., Sci Rep. 11:2166                                                                                                                                                                                                 |
|                        | various lung diseases                          | Cheng et al., 2020, Transl Lung cancer Res. 3:693-704<br>Lee et al., 2016, Lung Cancer Amst Neth. 102:89-95                                                                                                                                |
|                        | neutrophilic asthma                            | Yang et al., 2018, BioMed Res Int. 9230234                                                                                                                                                                                                 |
|                        | traveler's diarrhea                            | Zhu et al., 2018, Microbiome. 08:6(1):201                                                                                                                                                                                                  |
|                        | Sjogren's syndrome                             | Wu et al., 2019, Chin J Integr Med. 9:654-662                                                                                                                                                                                              |
|                        | gastric carcinogenesis                         | Wang et al., 2020, Front Microbiol. 11:997                                                                                                                                                                                                 |
| Rodent model           | Colitis                                        | Elinav et al., 2011, Cell. 5:745-757<br>Kang et al., 2013, Plos One. 8(10):e76520                                                                                                                                                          |
|                        | irritable bowel syndrome                       | Wang et al., 2018, Chin Med. 13:63                                                                                                                                                                                                         |
|                        | colon cancer                                   | Sivaprakasam et al., 2020, Biochem J. 19:3867-3883                                                                                                                                                                                         |

**Table S2. Host bacteria and their growth conditions for Saccharibacteria isolation. Related to Figure 2.**

| Strain name | Species                             | eHOMD HMT # | Media                          | Gas Temperature conditions used     | Strain source                       |
|-------------|-------------------------------------|-------------|--------------------------------|-------------------------------------|-------------------------------------|
| XH001       | Actinomyces odontolyticus           | 701         | BHI*                           | microaerophilic <sup>^</sup> , 37°C | He et al. 2015                      |
| W712        | Actinomyces meyeri                  | 671         | BHI                            | microaerophilic <sup>^</sup> , 37°C | Forsyth Institute Strain Collection |
| F0337       | Actinomyces species                 | 171         | BHI                            | microaerophilic <sup>^</sup> , 37°C | Forsyth Institute Strain Collection |
| F0386       | Actinomyces species                 | 170         | BHI                            | microaerophilic <sup>^</sup> , 37°C | Forsyth Institute Strain Collection |
| F0700       | Pseudopropionibacterium propionicum | 739         | TSBY**:<br>RPMI***<br>:FBS**** | microaerophilic <sup>^</sup> , 37°C | Forsyth Institute Strain Collection |
| F0333       | Actinomyces species                 | 850         | BHI                            | microaerophilic <sup>^</sup> , 37°C | Forsyth Institute Strain Collection |
| ORNL-0100   | Cellulosimicrobium cellulins        |             | TSBY:RPMI:FBS                  | microaerophilic <sup>^</sup> , 37°C | Mircea Podar strain                 |
| ORNL-0104   | Actinomyces species                 | 897         | TSBY:RPMI:FBS                  | microaerophilic <sup>^</sup> , 37°C | Mircea Podar strain                 |
| ATCC35568   | Actinomyces meyeri                  | 671         | BHI                            | microaerophilic <sup>^</sup> , 37°C | ATCC Global Bioresource Center      |

\*BHI: Brain Heart Infusion

\*\*TSBY:Trypticase Soy Broth, Yeast Extract (ATCC-1823)

\*\*\*RPMI: Gibco RPMI 1640 media

\*\*\*\*FBS: Fetal Bovine Serum

<sup>^</sup>microaerophilic condition corresponds to 2% oxygen, 5% CO<sub>2</sub> balanced with nitrogen

# HMT: Human Microbiome Taxon (part of eHOMD)

**Table S3. Cultivated Saccharibacteria strains. Related to Figure 2.**

| Strain name | HMT# | % identity | Host Bacterial strains                                            | Patient # | Isolation location | Conducted mouse experiment | Growth conditions <sup>^</sup> |
|-------------|------|------------|-------------------------------------------------------------------|-----------|--------------------|----------------------------|--------------------------------|
| BB002       | 957  | 99.7       | <i>Actinomyces</i> sp. strain F0337 (HMT-171)                     | 1         | subgingival        | yes                        | BHI*, micro                    |
| BB003       | 352  | 99.9       | <i>Actinomyces</i> sp. strain W712 (HMT-671)                      | 2         | subgingival        | no                         | BHI, micro                     |
| BB004       | 488  | 97.8       | <i>Actinomyces</i> sp. strain W712 (HMT-671)                      | 3         | subgingival        | yes                        | BHI, micro                     |
| BB006       | 955  | 99.8       | <i>Pseudopropionibacterium propionicum</i> strain F0700 (HMT-739) | 2         | subgingival        | yes                        | TSBY, micro                    |
| BB008       | 488  | 98         | <i>Pseudopropionibacterium propionicum</i> strain F0700 (HMT-739) | 3         | subgingival        | yes                        | TSBY**, micro                  |
| TM7x        | 952  | 100%       | <i>Actinomyces odontolyticus</i> (HMT-701)                        | healthy   | saliva             | yes                        | BHI, micro                     |

\*BHI: Brain Heart Infusion medium

\*\*TSBY:Trypticase Soy Broth, Yeast Extract (ATCC-1823)

<sup>^</sup>microaerophilic condition correspond to 2% oxygen, 5% CO2 balanced with nitrogen

# Human Microbiome Taxon (part of HOMD)

**Table S5. Primers used to create genetic deletion of cbp2 and nanE gene. Related to Figure 6.**

| Primer Name                        | Primer Sequence                                       | Primer # |
|------------------------------------|-------------------------------------------------------|----------|
| XH001Δcbp2 Up fragment F1          | 5'-AACGTCCAGCCCGCCAAGTCG-3'                           | 1        |
| XH001Δcbp2 Up fragment R1          | 5'-CTGAGCGGGACTCTGGGGTTCGCCGACTTCTCCTTCTATCGTCA-3'    | 2        |
| XH001Δcbp2 Kan fragment F1         | 5'-TGACGATAGAAGGAGAAGTCGGCGAACCCCAAGTCCCGCTCAG-3'     | 3        |
| XH001Δcbp2 Kan fragment R1         | 5'-GGTGTGGCCTCGCCTACGGCCTGCAGCCAAGCTAGCTTCAC-3'       | 4        |
| XH001Δcbp2 Dn fragment F1          | 5'-GTGAAGCTAGCTTGGCTGCAGGCCCGTAGGCGAGGCCACACC-3'      | 5        |
| XH001Δcbp2 Dn fragment R1          | 5'-GGGCAGCGGATCCTTGAGCGTG-3'                          | 6        |
| XH001ΔnanE Up fragment F1          | 5'GCCTCGTCGATTTTCTTATACCCC-3'                         | 7        |
| XH001ΔnanE Up fragment R1          | 5'-CTGAGCGGGACTCTGGGGTTCGCGGTGAACTCCTATGCGTGCA-3'     | 8        |
| XH001ΔnanE Kan fragment F1         | 5'-TGCACGCATAGGAGTTACCGCGAACCCCAAGTCCCGCTCAG-3'       | 9        |
| XH001ΔnanE Kan fragment R1         | 5'-CACTGTCCCAACAGCGACAGGACCTGCAGCCAAGCTAGCTTCAC-3'    | 10       |
| XH001ΔnanE Dn fragment F1          | 5'-GTGAAGCTAGCTTGGCTGCAGGTCCTGTGCTGTTGGGACAGTG-3'     | 11       |
| XH001ΔnanE Dn fragment R1          | 5'-ACGACCGCACCGGTGAAGG-3'                             | 12       |
| XH001Δcbp2 5' Junction F1          | 5'-GCGAAAATGCCCTAAAGTAGTC-3'                          | 13       |
| XH001Δcbp2 5' Junction R1          | 5'-CGTGATATTGCTGAAGAGCTTG-3'                          | 14       |
| XH001ΔnanE 5' Junction F1          | 5'-GTATCACGGCCTGGTACGAC-3'                            | 15       |
| XH001ΔnanE 5' Junction R1          | 5'-ATCAGGATGATCTGGACGAAGA-3'                          | 16       |
| XH001Δcbp2 mRNA Primer 1           | 5'-GCCTCGTCCAACCTCTGAGAC-3'                           | 17       |
| XH001Δcbp2 mRNA Primer 2           | 5'-GGATCGACGACCTTGATGTT-3'                            | 18       |
| XH001Δcbp2 mRNA Primer 3           | 5'-AAGGTCGGCATTAACTGTC-3'                             | 19       |
| XH001Δcbp2 mRNA Primer 4           | 5'-ATACGCGAAGGTCTGCTTGT-3'                            | 20       |
| XH001Δcbp2 mRNA Primer 5           | 5'-CGTGGATGTCAACCAGAATG-3'                            | 21       |
| XH001Δcbp2 mRNA Primer 6           | 5'-GCTCGGAATCACTCTTGGAG-3'                            | 22       |
| XH001ΔnanE mRNA Primer 1           | 5'-AACCTGAAGGGCAAGCTCAT-3'                            | 23       |
| XH001ΔnanE mRNA Primer 2           | 5'-TTCCACAGCAGCCTTAAACC-3'                            | 24       |
| XH001 16s mRNA Primer 1            | 5'-GCGGAGCATGCGGATTA-3'                               | 25       |
| XH001 16s mRNA Primer 2            | 5'-AACGTGCTGGCAACATAGGG-3'                            | 26       |
| XH001 nanT gene primer 1 (RT-qPCR) | 5'-GTGGATGGCTACGGCTACTC-3' (primer efficiency 103.3%) | 27       |
| XH001 nanT gene primer 2 (RT-qPCR) | 5'GTGAAGGTGATGCGCAGCAGC-3' (primer efficiency 103.3%) | 28       |
